# Supplementary material for: Allocation of Service Time in a Multiserver System
Source: Atypon-hosted journal article supplement (doi:10.1287/mnsc.1050.0467), 2006-04-01
Supplement: mnsc.1050.0467-sm-el_tahamaddah_appendix.pdf [file mnsc.1050.0467-sm-el_tahamaddah_appendix.pdf]

# Supplement for “Allocation of Service Time in a Multi-Server System”

Muhammad El-Taha  
Department of Mathematics and Statistics  
University of Southern Maine  
96 Falmouth Street  
Portland, ME 04104-9300  
Email:eltaha@usm.maine.edu  
and  
Bacel Maddah  
Grado Department of Industrial and Systems Engineering  
Virginia Tech  
Blacksburg, VA 24061-0118  
Email:bmaddah@vt.edu

September 9, 2005

## Service Time Distributions

We present a brief summary of four distributions characterized by high variability, namely, Two Phase Hyperexponential, Erlang-Hyperexponential, Weibull, and truncated Pareto distributions.

### Two Phase Hyperexponential ( $H_2$ ).

We consider a Two Phase Hyperexponential which density function is given by

$g(t) = 2p^2\mu e^{-2p\mu t} + 2(1-p)^2\mu e^{-2(1-p)\mu t}$ , ( $0 \leq p \leq \frac{1}{2}$ ). Therefore

$$E[S] = 1/\mu, \quad E[S^2] = 1/(2p(1-p)\mu^2),$$

$$P(S > T) = pe^{-2p\mu T} + (1-p)e^{-2(1-p)\mu T},$$

$$E[S_1] = \frac{1}{\mu} - \frac{1}{2\mu}(e^{-2p\mu T} + e^{-2(1-p)\mu T}),$$

$$E[S_1^2] = \frac{1}{2p(1-p)\mu^2} - \left(\frac{1}{2p\mu^2} + \frac{T}{\mu}\right)e^{-2p\mu T} - \left(\frac{1}{2(1-p)\mu^2} + \frac{T}{\mu}\right)e^{-2(1-p)\mu T}.$$

This distribution is interpreted as a mixture of two exponential probability distributions.

**Erlang-Hyperexponential ( $EH_2$ ).**

The density function of this distribution, a mixture of an exponential and an Erlang with two exponential phases, is given by

$g(t) = 4p^3\mu^2te^{-2p\mu t} + 2(1-p)^2\mu e^{-2(1-p)\mu t}$ , ( $0 \leq p \leq 1$ ). Therefore

$$E[S] = 1.5/\mu, \quad E[S^2] = (3-2p)/(2p(1-p)\mu^2),$$

$$P(S > T) = 2p^2\mu T e^{-2p\mu T} + p e^{-2p\mu T} + (1-p)e^{-2(1-p)\mu T},$$

$$E[S_1] = \frac{1.5}{\mu} - \left(\frac{1}{\mu} + pT\right) e^{-2p\mu T} - \frac{1}{2\mu} e^{-2(1-p)\mu T},$$

$$E[S_1^2] = \frac{3-2p}{2p(1-p)\mu^2} - \left(\frac{3}{2p\mu^2} + \frac{3T}{\mu} + 2pT^2\right) e^{-2p\mu T} - \left(\frac{1}{2(1-p)\mu^2} + \frac{T}{\mu}\right) e^{-2(1-p)\mu T}.$$

**Weibull.**

We consider the familiar Weibull distribution with shape factor  $\alpha$  and scale factor  $\beta$ . The density function is given by  $g(t) = \alpha\beta^{-\alpha}t^{\alpha-1}e^{-(t/\beta)^\alpha}$ . Therefore

$$E[S] = (\beta/\alpha)\Gamma(1/\alpha), \text{ where } \Gamma(z) = \int_0^\infty t^{z-1}e^{-t}dt,$$

$$E[S^2] = (2\beta^2/\alpha)\Gamma(2/\alpha), \quad P(S > T) = e^{-(T/\beta)^\alpha},$$

$$E[S_1] = \int_0^T e^{-(t/\beta)^\alpha} dt, \quad E[S_1^2] = \int_0^T \alpha\beta^{-\alpha}t^{\alpha+1}e^{-(t/\beta)^\alpha} dt + T^2e^{-(T/\beta)^\alpha}.$$

The above two integrals have no closed form solutions. In our analysis we evaluate these integrals numerically.

**Truncated Pareto.**

We consider a truncated Pareto distribution with a density function given by

$g(t) = \frac{\alpha l^\alpha}{1-(l/u)^\alpha}t^{-\alpha-1}$ ,  $l \leq t \leq u$ , where  $u$  and  $l$  are the largest and smallest job sizes and  $0 < \alpha < 2$ .

In all the numerical examples in this paper, we fix  $u$  at  $10^{10}$  and we select  $l$  in such a way as to keep the mean of the distribution equal to 3000. Therefore, for  $l \leq T \leq u$ ,

$$E[S] = 3000, \quad E[S^2] = \frac{\alpha l^\alpha (l^{2-\alpha} - u^{2-\alpha})}{(\alpha - 2)[1 - (l/u)^\alpha]},$$

$$\begin{aligned}
P(S > T) &= \frac{(l/T)^\alpha - (l/u)^\alpha}{1 - (l/u)^\alpha}, \\
E[S_1] &= \frac{\alpha l^\alpha (l^{1-\alpha} - T^{1-\alpha})}{(\alpha - 1)[(1 - (l/u)^\alpha)]} + TP(S > T), \\
E[S_1^2] &= \frac{\alpha l^\alpha (l^{2-\alpha} - T^{2-\alpha})}{(\alpha - 2)[(1 - (l/u)^\alpha)]} + T^2 P(S > T).
\end{aligned}$$

Harchol-Balter [10] indicates that such a job size distribution is found in many real world computer systems and cites many empirical studies that support this fact.

## Proof of Analytic Results

**Proof of Lemma 3.1.** Conditioning on  $\{S > T\}$ , equation (7) implies that

$$E[S] = E[S_1] + P(S > T)E[S_2]. \quad (\text{S.1})$$

By replacing  $\lambda P(S > T)E[S_2]$  by its value from (S.1) the stability conditions are reduced to

$$\lambda E[S] - r < \lambda E[S_1] < m. \quad (\text{S.2})$$

Notice that, for  $T = 0$ ,  $\lambda E[S_1] = 0$ , i.e. all work is diverted to Station 2. On the other hand if  $T = t_u$ , where  $t_u$  is the smallest value of  $t$  such that  $P(S > t) = 0$ , then  $\lambda E[S_1] = \lambda E[S]$ , i.e. all work is processed through Station 1.<sup>1</sup> Moreover,  $\lambda E[S_1]$  is increasing (and continuous) in  $T$  for  $T \in (0, t_u)$  as shown in Section 2.1.1. Therefore, since  $m > 0$  and  $\lambda E[S] - r < m$  (from the overall stability condition), there always exists a  $T$  such that (S.2) holds. ■

**Proof of Lemma 3.2.** The proof follows from (S.2) and the fact that  $E[S_1]$  is increasing in  $T$  for  $T \in (0, t_u)$ . ■

**Proof of Corollary 3.3.** The proof follows from Lemma 3.2 and the fact that  $E[S_1]$  is increasing in  $T$  for  $T \in (0, t_u)$ . Note that  $\bar{T} = \max_{m=1, \dots, c-1} \bar{T}_m = \bar{T}_{c-1}$  and  $\underline{T} = \min_{m=1, \dots, c-1} \underline{T}_m = \underline{T}_1$ . ■

---

<sup>1</sup>Note that  $t_u < \infty$  for bounded distributions only. For unbounded distributions,  $t_u = \infty$ , implying that all work cannot be processed by Station 1 except for an infinite  $T$ .

**Proof of Lemma 3.4.** Note that if  $\rho \rightarrow 1$ , (i.e.  $\lambda E[S] \rightarrow c$ ), (S.2) implies that  $E[S_1] \rightarrow (m/c)E[S]$ , or equivalently  $\rho_1 \rightarrow 1$ , and  $T_m^* \rightarrow T_m^b$ . (Recall that  $E[S_1]$  is continuous and increasing in  $T$  for  $T \in (0, t_u)$ .) Finally, (S.1) implies that  $\lambda P(S > T_m^b)E[S_2] = \lambda E[S] - \lambda E[S_1] \rightarrow c - m = r$ , or equivalently  $\rho_2 \rightarrow 1$ . ■

**Proof. of Theorem 3.7.** Consider a balanced series system with  $m = c - 1$ , that is  $r = 1$ . Since  $E[S^2]$  approaches infinity for the three distributions above, then, similar to the proof of Theorem 3.6, it suffices to show that  $C_S^2 > C_{S_2}^2$ . To prove (i), using results from the first section of this supplement, we obtain

$$E[S_2] = \frac{e^{-2p\mu T_m^b} + e^{-2(1-p)\mu T_m^b}}{2\mu(pe^{-2p\mu T_m^b} + (1-p)e^{-2(1-p)\mu T_m^b})},$$

$$E[S_2^2] = \frac{\frac{1}{2p\mu^2}e^{-2p\mu T_m^b} + \frac{1}{2(1-p)\mu^2}e^{-2(1-p)\mu T_m^b}}{pe^{-2p\mu T_m^b} + (1-p)e^{-2(1-p)\mu T_m^b}}.$$

As  $p \rightarrow 0$ ,  $E[S_2] \rightarrow (1 + e^{-2\mu T_m^b})/(2\mu e^{-2\mu T_m^b})$ ,  $E[S_2^2] \rightarrow 1/(2p\mu^2 e^{-2\mu T_m^b})$ , and  $C_S^2 \rightarrow 1/(2p)$ .

Therefore, with  $C_{S_2}^2 = E[S_2^2]/(E[S_2])^2 - 1$ ,

$$\lim_{p \rightarrow 0} \frac{C_S^2}{C_{S_2}^2} = \frac{(1 + e^{-2\mu T_m^b})^2}{4e^{-2\mu T_m^b}} > 1,$$

which completes the proof of (i).

To prove (ii), it can be shown that when  $S \sim EH_2$ ,

$$E[S_2] = \frac{\left(\frac{1}{\mu} + pT_m^b\right)e^{-2p\mu T_m^b} + \frac{1}{2\mu}e^{-2(1-p)\mu T_m^b}}{2p^2\mu T_m^b e^{-2p\mu T_m^b} + pe^{-2p\mu T_m^b} + (1-p)e^{-2(1-p)\mu T_m^b}},$$

$$E[S_2^2] = \frac{\left(\frac{3}{2p\mu^2} + \frac{T}{\mu}\right)e^{-2p\mu T_m^b} + \frac{1}{2(1-p)\mu^2}e^{-2(1-p)\mu T_m^b}}{2p^2\mu T_m^b e^{-2p\mu T_m^b} + pe^{-2p\mu T_m^b} + (1-p)e^{-2(1-p)\mu T_m^b}}$$

As  $p \rightarrow 0$ ,  $E[S_2] \rightarrow (1/\mu + (1/2\mu)e^{-2\mu T_m^b})/(e^{-2\mu T_m^b})$ ,  $E[S_2^2] \rightarrow 3/(2p\mu^2 e^{-2\mu T_m^b})$ , and  $C_S^2 \rightarrow 2/(3p)$ .

Therefore,

$$\lim_{p \rightarrow 0} \frac{C_S^2}{C_{S_2}^2} = \frac{4(1 + \frac{1}{2}e^{-2\mu T_m^b})^2}{9e^{-2\mu T_m^b}} = \frac{4}{9} + \frac{1}{9}(4e^{2\mu T_m^b} + e^{-2\mu T_m^b}) > 1,$$

where the last inequality follows since it can be easily shown that  $4e^x + e^{-x} > 5$  for all  $x > 0$ . This completes the proof of (ii).

To prove (iii), it can be shown that when  $S \sim Wbl$ ,

$$E[S_2] = \frac{\frac{\beta}{\alpha} \Gamma\left(\frac{1}{\alpha}\right) - \int_0^{T_m^b} e^{(t/\beta)^\alpha} dt}{e^{-(T_m^b/\beta)^\alpha}},$$

$$E[S_2^2] = \frac{\frac{2\beta^2}{\alpha} \Gamma\left(\frac{2}{\alpha}\right) - \int_0^{T_m^b} \alpha \beta^{-\alpha} t^{\alpha+1} e^{-(t/\beta)^\alpha} dt - T_m^{b^2} e^{-(T_m^b/\beta)^\alpha}}{e^{-(T_m^b/\beta)^\alpha}} - 2T_m^b E[S_2].$$

As  $\alpha \rightarrow 0$ ,  $E[S_2] \rightarrow (\beta e/\alpha)\Gamma(1/\alpha)$  (since  $\Gamma(\infty) = \infty$ ),  $E[S_2^2] \rightarrow (2\beta^2 e/\alpha)\Gamma(2/\alpha) - 2T_m^b (\beta e/\alpha)\Gamma(1/\alpha)$ , and  $C_S^2 \rightarrow 2\alpha\Gamma(2/\alpha)/(\Gamma(1/\alpha))^2$ . Therefore,

$$\lim_{\alpha \rightarrow 0} \frac{C_S^2}{C_{S_2}^2} = e > 1,$$

which completes the proof of (iii). ■

**Proof of Lemma 3.8.** The proof of (i) follows by noting that  $\rho_1 = \lambda E[S_1]/m$  and  $E[S_1]$  is non-decreasing in  $T$  (see Section 2.1.1). The proof of (ii) also follows from the fact that  $E[S_1]$  is non-decreasing in  $T$  by noting that  $\rho_2 = \lambda(E[S] - E[S_1])/(c - m)$ . To prove (iii), consider the derivative of  $E[S_1^2]$  in (3) with respect to  $T$

$$\frac{dE[S_1^2]}{dT} = 2TP(S > T).$$

Noting that  $C_{S_1}^2 = E[S_1^2]/(E[S_1])^2 - 1$ , then

$$\frac{dC_{S_1}^2}{dT} = \frac{2P(S > T)(TE[S_1] - E[S_1^2])}{(E[S_1])^3} \geq 0,$$

where the last inequality follows from the fact that  $S_1 \leq T$ . ■

**Proof of Lemma 3.9.** The proof is achieved by deriving a closed form expression for  $C_{S_2}^2$ . When

$S \sim H_2$ , the expressions for  $E[S_2]$  and  $E[S_2^2]$  in the proof of Theorem 3.7 imply that

$$C_{S_2}^2 = \frac{2e^{-2\mu T}(-4 + \frac{1}{p(1-p)})}{(e^{-2p\mu T} + e^{-2(1-p)\mu T})^2} + 1.$$

Therefore,

$$\frac{dC_{S_2}^2}{dT} = \frac{-4\mu e^{-2\mu T}(1-2p)(-4 + \frac{1}{p(1-p)})(e^{-2p\mu T} - e^{-2(1-p)\mu T})}{(e^{-2p\mu T} + e^{-2(1-p)\mu T})^3} \leq 0,$$

for  $0 \leq p \leq \frac{1}{2}$ . ■

**Proof of Lemma 3.10.** The proof follows directly from the above two lemmas. When  $T = 0$ , we have  $C_{S_2}^2 = C_S^2$ . Since, when  $S \sim H_2$  and  $p < \frac{1}{2}$ ,  $C_{S_2}^2$  is strictly decreasing in  $T$ , we obtain  $C_{S_2}^2 < C_S^2$ . When  $T = \infty$ , equations (2) and (3) imply that  $C_{S_1}^2 = C_S^2$ . Since  $C_{S_1}^2$  is strictly increasing in  $T$ , we conclude that  $C_{S_1}^2 < C_S^2$ . ■
